# Supplementary material
Source: Royal Society of Chemistry journal article supplement (doi:10.1039/d6sm00058d)
Supplement: d6sm00058d1.pdf [file d6sm00058d1.pdf]

## Supplementary Information for

### Recyclable flexible sensors based on digital-light-processing 3D printing of thermoplastic elastomer and facile transfer of pencil-marked graphite films

Linkai Wang,<sup>§a</sup> Meichen Liu,<sup>§a</sup> Dan Guo,<sup>a</sup> Feng Jin,<sup>\*b</sup> Chenyang Bi,<sup>a</sup> Hui Zhang,<sup>a</sup> Liang Jiang,<sup>\*a</sup>

Shaojuan Chen,<sup>a</sup> and Zhong Xiong<sup>\*a</sup>

<sup>a</sup> College of Chemistry and Chemical Engineering, College of Textiles and Clothing, Qingdao University, Qingdao, 266071, China.

<sup>b</sup> Beijing Key Laboratory of Special Elastomer Composite Materials, College of New Materials and Chemical Engineering, Beijing Institute of Petrochemical Technology, Beijing 102617, China.

§ These authors contributed equally.

#### Corresponding Authors

\* E-mail: xiongzong22@163.com (Z.X.).

\* E-mail: liang.jiang@qdu.edu.cn (L.J.).

\* E-mail: jinffeng@bipt.edu.cn (F.J.).

### Characterization of conversion rate of isodecyl acrylate (IDA)

The photoresin was uniformly coated onto a KBr plate to form a smooth and homogeneous film. Subsequently, the coating was irradiated with a high voltage UV mercury lamp (wavelength: 365 nm; power: 500 W). The conversion rate of the IDA monomer was determined by monitoring the change in peak area of the photoresin at  $1636\text{ cm}^{-1}$  on an FTIR spectrometer (Nicolet is50, Thermo Fisher Scientific), and the IDA conversion rate was calculated using the following equation:

$$\text{Conversion\%} = \left[1 - \frac{A_t}{A_0}\right] \times 100\%$$

Where  $A_0$  and  $A_t$  are the absorbance peak areas at 0 and  $t$  s of UV irradiation, respectively.

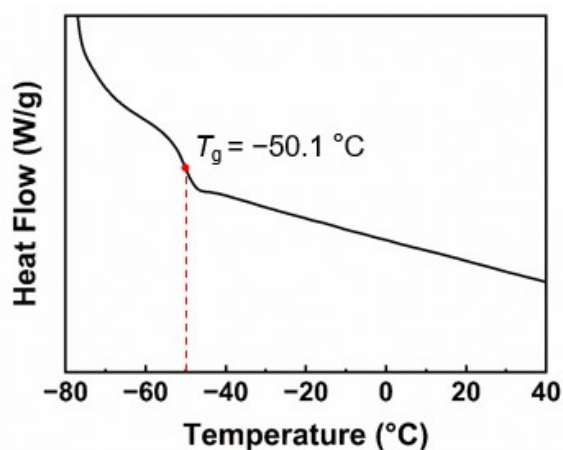

Fig. S1 DSC thermogram of SEBS.

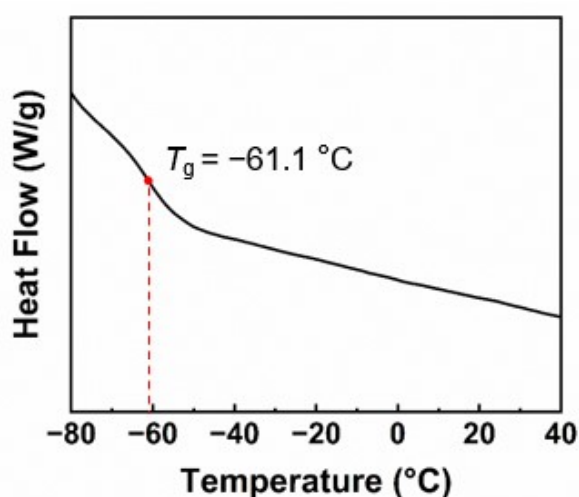

Fig. S2 DSC thermogram of PIDA.

**Table S1** IDA Conversion rate with various UV irradiation times

|                         |   |      |      |
|-------------------------|---|------|------|
| UV irradiation time (s) | 0 | 10   | 250  |
| IDA Conversion (%)      | 0 | 48.2 | 92.6 |
